# Supplementary material
Source: bioRxiv or medRxiv preprint supplement (https://www.biorxiv.org/highwire/filestream/96063/field_highwire_adjunct_files/1/313072-2.pdf)
Supplement: Supplementary file [file 313072-2.pdf]

**Suppl. Table 2.** Dose-dependent effects of omeprazole on the acyclovir concentrations that reduce HSV-1- and HSV-2-induced cytopathogenic effect (CPE) formation by 50% (IC<sub>50</sub>) in HaCat cells. The investigated drug concentrations did not affect cell viability, neither alone, nor in combination. Omeprazole alone did not affect CPE formation.

| <b>HSV-1</b>       |                                    |
|--------------------|------------------------------------|
| Omeprazole (µg/mL) | Acyclovir IC <sub>50</sub> (µg/mL) |
| 0                  | 0.62 ± 0.06                        |
| 10                 | 0.19 ± 0.05                        |
| 20                 | 0.074 ± 0.013                      |
| 40                 | 0.029 ± 0.010                      |
| 80                 | 0.013 ± 0.006                      |

| <b>HSV-2</b>       |                                    |
|--------------------|------------------------------------|
| Omeprazole (µg/mL) | Acyclovir IC <sub>50</sub> (µg/mL) |
| 0                  | 1.42 ± 0.17                        |
| 10                 | 0.45 ± 0.09                        |
| 20                 | 0.23 ± 0.05                        |
| 40                 | 0.22 ± 0.06                        |
| 80                 | 0.11 ± 0.03                        |
